# Supplementary material for: Modeling Reveals Bistability and Low-Pass Filtering in the Network Module Determining Blood Stem Cell Fate
Source: PubMed Central journal article supplement (PMC2865510; doi:10.1371/journal.pcbi.1000771), 2010-05-06
Supplement: pcbi.1000771.s009.pdf [file pcbi.1000771.s009.pdf]

**Table S2.** Notation for various symbols used in the main text and supplementary information

|                                           | Symbol               | Name                                                                                                                               |
|-------------------------------------------|----------------------|------------------------------------------------------------------------------------------------------------------------------------|
| Free Energies of different configurations | $G_i^C$              | Closed chromatin conformation of enhancer $i$ : ( $i = s$ ( $Scl+19$ ), $g$ ( $Gata2-3$ ), $f$ ( $Fli1+12$ ))                      |
|                                           | $G_i^{Gata2}$        | Gata2 bound to enhancer $i$ : ( $i = s$ ( $Scl+19$ ), $g$ ( $Gata2-3$ ), $f$ ( $Fli1+12$ ))                                        |
|                                           | $G_i^{Fli1}$         | Fli1 bound to enhancer $i$ : ( $i = s$ ( $Scl+19$ ), $g$ ( $Gata2-3$ ), $f$ ( $Fli1+12$ ))                                         |
|                                           | $G_i^{Fli1Gata2}$    | Gata2& Fli1 bound to enhancer $i$ : ( $i = s$ ( $Scl+19$ ), $g$ ( $Gata2-3$ ), $f$ ( $Fli1+12$ ))                                  |
|                                           | $G_i^{SclGata2Fli1}$ | Scl&Gata2&Fli1 bound to enhancer $i$ : ( $i = g$ ( $Gata2-3$ ), $f$ ( $Fli1+12$ ))                                                 |
|                                           | $G^N$                | Notch bound to promoter                                                                                                            |
|                                           | $G^B$                | Bmp4 bound to promoter                                                                                                             |
|                                           | $G^P$                | Polymerase bound to promoter                                                                                                       |
| Free energies of interaction              | $G^{BP}$             | Bmp4 and RNA polymerase interaction energy                                                                                         |
|                                           | $G^{NP}$             | Notch and RNA polymerase interaction energy                                                                                        |
| Chromatin Equilibrium Constants           | $K_i$                | Chromatin equilibrium constant for enhancer $i$ : ( $i = s$ ( $Scl+19$ ), $g$ ( $Gata2-3$ ), $f$ ( $Fli1+12$ )) $K_i = e^{-G_i^C}$ |
| Concentrations                            | $[SCL]$              | Intracellular Scl concentration                                                                                                    |
|                                           | $[GAT]$              | Intracellular Gata2 concentration                                                                                                  |
|                                           | $[FLI]$              | Intracellular Fli1 concentration                                                                                                   |
|                                           | $[Gata1]$            | Intracellular Gata1 concentration                                                                                                  |
|                                           | $[N]$                | Intracellular Notch concentration                                                                                                  |
|                                           | $[B]$                | Intracellular Bmp4 concentration                                                                                                   |
|                                           | $[R_p]$              | Intracellular RNA polymerase concentration                                                                                         |
| Steady State Concentrations               | $[\overline{SCL}]$   | Scl concentration in high steady state                                                                                             |
|                                           | $[\overline{GAT}]$   | Gata2 concentration in high steady state                                                                                           |
|                                           | $[\overline{FLI}]$   | Fli1 concentration in high steady state                                                                                            |

|                              |                                                                       |                                                                                                                                                                                                |
|------------------------------|-----------------------------------------------------------------------|------------------------------------------------------------------------------------------------------------------------------------------------------------------------------------------------|
| Dimensionless Concentrations | $[scl]$                                                               | Concentration of Scl relative to concentration in high steady state.<br>$[scl] = [SCL] / \overline{[SCL]}$                                                                                     |
|                              | $[gat]$                                                               | Concentration of Gata2 relative to concentration in high steady state.<br>$[gat] = [GAT] / \overline{[GAT]}$                                                                                   |
|                              | $[fli]$                                                               | Concentration of Fli1 relative to concentration in high steady state.<br>$[fli] = [FLI] / \overline{[FLI]}$                                                                                    |
|                              | $[n]$                                                                 | Concentration of Notch relative to dissociation constant of binding to the promoter. $[n] = [N] / e^{G^N}$                                                                                     |
|                              | $[b]$                                                                 | Concentration of Scl relative to concentration in high steady state.<br>$[b] = [B] / e^{G^B}$                                                                                                  |
| Other symbols used           | $p_o^i$                                                               | Probability of open chromatin conformation for enhancer $i$ :<br>( $i = s (Scl+19), g (Gata2-3), f (Fli1+12)$ )                                                                                |
|                              | $p^i(R_p)$                                                            | Probability of RNA polymerase being bound to promoter for enhancer-reporter construct with enhancer $i$ :<br>( $i = s (Scl+19), g (Gata2-3), f (Fli1+12)$ ). $p^i(R_p) = [R_p] e^{-G^P} p_o^i$ |
|                              | $I_o^i$                                                               | Maximum rate of transcription from SV promoter. $I_o = kR_p e^{-G^P}$                                                                                                                          |
|                              | $I^i$                                                                 | Rate of transcription from SV promoter-enhancer construct for enhancer $i$ : ( $i = s (Scl+19), g (Gata2-3), f (Fli1+12)$ ) $I^i = I_o p_o^i$                                                  |
|                              | $I_1$                                                                 | Maximum rate of protein production from SV promoter. $I_1 = k_1 I_o$                                                                                                                           |
|                              | $k$                                                                   | Rate of isomerization of SV promoter bound RNA polymerase to open conformation                                                                                                                 |
|                              | $k_1$                                                                 | Number of proteins produced per lifetime of mRNA                                                                                                                                               |
|                              | $Z_i$                                                                 | Partition function for enhancer $i$ : ( $i = s (Scl+19), g (Gata2-3), f (Fli1+12)$ )                                                                                                           |
|                              | $Z_i^E$                                                               | Sum of Boltzmann weights for all open chromatin state enhancer configurations of enhancer $i$ . ( $i = s (Scl+19), g (Gata2-3), f (Fli1+12)$ ).                                                |
| $k_d^i$                      | Degradation rate for TR $i$ : ( $i = s (Scl), g (Gata2), f (Fli1)$ ). |                                                                                                                                                                                                |
