# Supplementary material for: Modeling Reveals Bistability and Low-Pass Filtering in the Network Module Determining Blood Stem Cell Fate
Source: PubMed Central journal article supplement (PMC2865510; doi:10.1371/journal.pcbi.1000771), 2010-05-06
Supplement: pcbi.1000771.s010.pdf [file pcbi.1000771.s010.pdf]

## Table S3

Table S3. Free energy values used in the model for Scl-Gata2-Fli1 triad

|                | <b>TR</b>      | <b>Symbol</b>        | <b>Value</b> |
|----------------|----------------|----------------------|--------------|
| <i>Scl+19</i>  | Gata2          | $G_s^{Gata2}$        | -5.1304      |
|                | Fli1           | $G_s^{Fli1}$         | -2.8991      |
|                | Fli1-Gata2     | $G_s^{Fli1Gata2}$    | -17.0239     |
| <i>Gata2-3</i> | Gata2          | $G_g^{Gata2}$        | 0.3229       |
|                | Fli1           | $G_g^{Fli1}$         | 0.1614       |
|                | Fli1-Gata2     | $G_g^{Fli1Gata2}$    | -5.4957      |
|                | Scl-Fli1-Gata2 | $G_g^{SclGata2Fli1}$ | -13.6429     |
| <i>Fli1+12</i> | Gata2          | $G_f^{Gata2}$        | 0.6687       |
|                | Fli1           | $G_f^{Fli1}$         | 0.3343       |
|                | Fli1-Gata2     | $G_f^{Fli1Gata2}$    | -3.2967      |
|                | Scl-Gata2-Fli1 | $G_f^{SclGata2Fli1}$ | -7.4961      |
